# Supplementary material for: Colorimetric and fluorescence probe for the detection of nano-molar lysine in aqueous medium
Source: Royal Society of Chemistry journal article supplement (doi:10.1039/c6ob01704e), 2016-01-01
Supplement: c6ob01704e1.pdf [file c6ob01704e1.pdf]

# Colorimetric and fluorescent probe for detection of nanomolar lysine in aqueous medium

Susanta Adhikari<sup>a\*</sup>, Avijit Ghosh<sup>a</sup>, Sandip Mandal<sup>b</sup>, Subhajit Guria<sup>a</sup>, Prajna Paramita Banerjee<sup>c</sup>, Ansuman Chatterjee<sup>c</sup> and Debasis Das<sup>b\*</sup>

<sup>a</sup>Department of Chemistry, University of Calcutta, 92, A.P.C. Road, Kolkata 700 009, West Bengal, India

<sup>b</sup>Department of Chemistry, The University of Burdwan, Burdwan 713104, West Bengal, India

<sup>c</sup>Department of Zoology, Visva Bharati University, Santiniketan, West Bengal, India

| INDEX                                                                                                                                                       | page no.      |
|-------------------------------------------------------------------------------------------------------------------------------------------------------------|---------------|
| General information .....                                                                                                                                   | (S-2)         |
| Calculation of detection limits .....                                                                                                                       | (S-3)         |
| <sup>1</sup> H, <sup>13</sup> C NMR and mass spectra of the compounds.....                                                                                  | (S-4)-(S-11)  |
| <b>Table S-1</b> Crystal data and structure refinement for THBPY (CCDC No. 1409304) .....                                                                   | (S-12)-(S-15) |
| <b>Figure S-7</b> Visible color changes of THBPY (10 μM) in DMSO–HEPES buffer).....                                                                         | (S-16)        |
| <b>Figure S-8</b> Effect of pH on the emission intensity of THBPY and [THBPY- Lys]... ..                                                                    | (S-16)        |
| <b>Figure S-9</b> HRMS spectrum of [THBPY- Lys] in methanol.....                                                                                            | (S-17)        |
| <b>Figure S-10</b> Change in absorbance of [THBPY+ butyl amine] complex.....                                                                                | (S-18)        |
| <b>Figure S-11</b> Change in absorbance of THBPY (10μM) upon addition of butyl amine 1,5-diaminopentane, 6-amino hexanoic acid, ethelenediamine .....       | (S-19)        |
| <b>Figure S-12</b> Change in fluorescence of THBPY (10μM) upon addition of butyl amine, 1,5-diaminopentane, 6-amino hexanoic acid and ethylenediamine ..... | (S-19)        |
| <b>Figure S-13</b> Reversibility of absorbance of [THBPY+ Lys] adduct in DMSO–HEPES buffer ----                                                             | (S-20)        |

**Figure S-14** Reversibility of fluorescence of [THBPY-Lys] adduct in DMSO–HEPES buffer  
..... (S-20)

**Figure S-15** HRMS spectrum after H<sub>2</sub>O<sub>2</sub> treatment of [THBPY+ Lys] adduct ..... (S-21)

**Figure S-16** Changes in the emission profile of compound 3 upon addition of Lys .. (S-21)

**Figure S-17** Change in the absorbance of compound 3 upon addition of Lys..... (S-22)

**Figure S-18** Changes in the emission profile of compound-4 upon addition of Lys.... (S-22)

**Figure S-19** Changes in the absorbance of compound-4 upon addition of butyl amine 1,5-diaminopentane and 6-amino hexanoic acid complex..... (S-23)

**Table S-2** Frontier molecular orbitals (MOs) of THBPY and energy levels of the MOs..... (S-23)

**Table S-3** Frontier molecular orbitals (MOs) of THBPY+ Lys (neutral) and the energy levels of MOs..... (S-24)

**Table S-4** Frontier molecular orbitals (MOs) of THBPY+ Lys (cationic) and the energy levels of MOs..... (S-25)

**Figure S-20** Selected MOs of THBPY, [THBPY + cysteine], [THBPY + homo cysteine]..... (S-26)

Cell imaging & cytotoxicity.....(S-27)

### General information

Reagents and solvents were purchased from commercial suppliers and used as received. <sup>1</sup>H and <sup>13</sup>C NMR spectra were recorded on a Bruker Avance III HD (300 MHz) spectrometer. Chemical shifts were reported in parts per million (ppm), and the residual solvent peak was used as an internal reference: proton (chloroform δ 7.26), carbon (chloroform δ 77.16) or tetramethylsilane (TMS δ 0.00) was used as a reference. Multiplicity was indicated as follows: s (singlet), d (doublet), t (triplet), q (quartet), m (multiplet), dd (doublet of doublet), bs (broad

singlet). Coupling constants were reported in Hertz (Hz). High resolution mass spectra were obtained on a Micromass/Q-Toff. micro<sup>TM</sup> spectrometer. IR spectra were measured on Thermo Scientific Nicolet 380 instrument. For thin layer chromatography (TLC), Merck precoated TLC plates (Merck 60 F254) were used, and compounds were visualized with a UV light at 254 nm. Further visualization was achieved by staining with iodine. Flash chromatography separations were performed on SRL 230-400 mesh silica gel.

### Measurement of fluorescence quantum yield

For determination of the fluorescence quantum yields ( $\Phi_f$ ), of BODIPY dye we used a Perkin-Elmer instrument, with fluorescein in 0.1 M NaOH as a fluorescence standard (fluorescence quantum yield of 0.85 in 0.1 N NaOH).

Fluorescence quantum yields ( $\Phi_f$ ) were obtained by the following equation

$$\Phi_f^{\text{sample}} = \Phi_f^{\text{standard}} \frac{\text{Abs}^{\text{standard}} \Sigma[F^{\text{sample}}]}{\text{Abs}^{\text{sample}} \Sigma[F^{\text{standard}}]}$$

Where F denotes fluorescence intensity at each wavelength and  $\Sigma [F]$  was calculated by summation of fluorescence intensity.<sup>1</sup>

| solvent                         | Absorbance<br>maximum | Fluorescence<br>maximum | Quantum<br>yield (%) |
|---------------------------------|-----------------------|-------------------------|----------------------|
| CH <sub>2</sub> Cl <sub>2</sub> | 504                   | 517                     | 80                   |
| Methanol                        | 503                   | 515                     | 68                   |

### Equation used for calculating detection limit (DL)

DL = CL × CT; where CL = conc. of ligand; CT = conc. of Lys at which fluorescence enhanced.

Thus, DL = 1 × 10<sup>-6</sup> × 0.001 μM = 0.001 × 10<sup>-6</sup> μM.

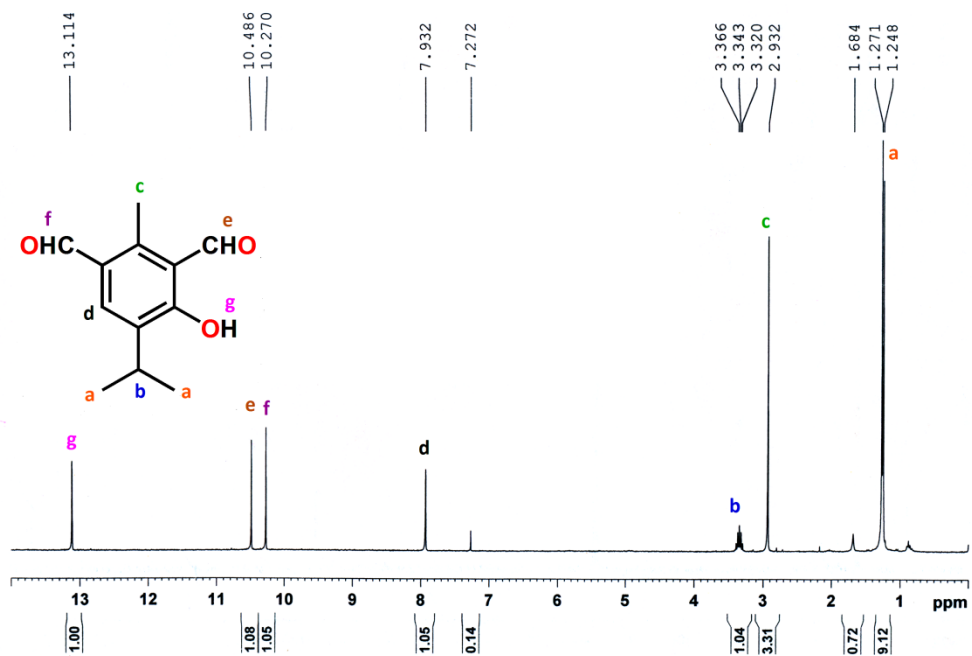

**Figure S-1**  $^1\text{H}$  NMR spectrum of **DFTH** in  $\text{CDCl}_3$

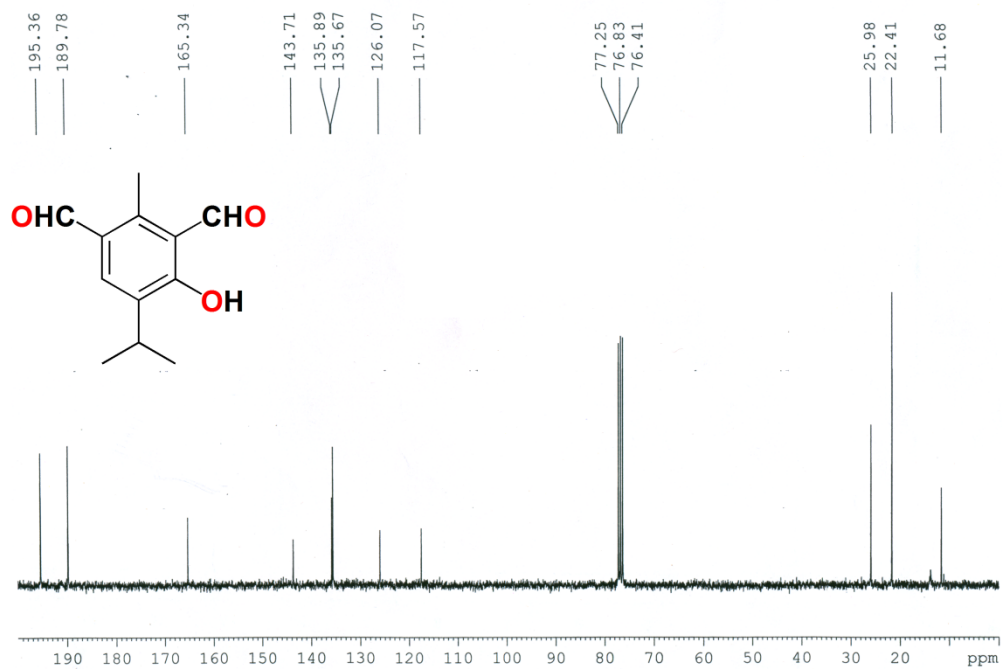

**Figure S-2**  $^{13}\text{C}$  NMR spectrum of **DFTH** in  $\text{CDCl}_3$

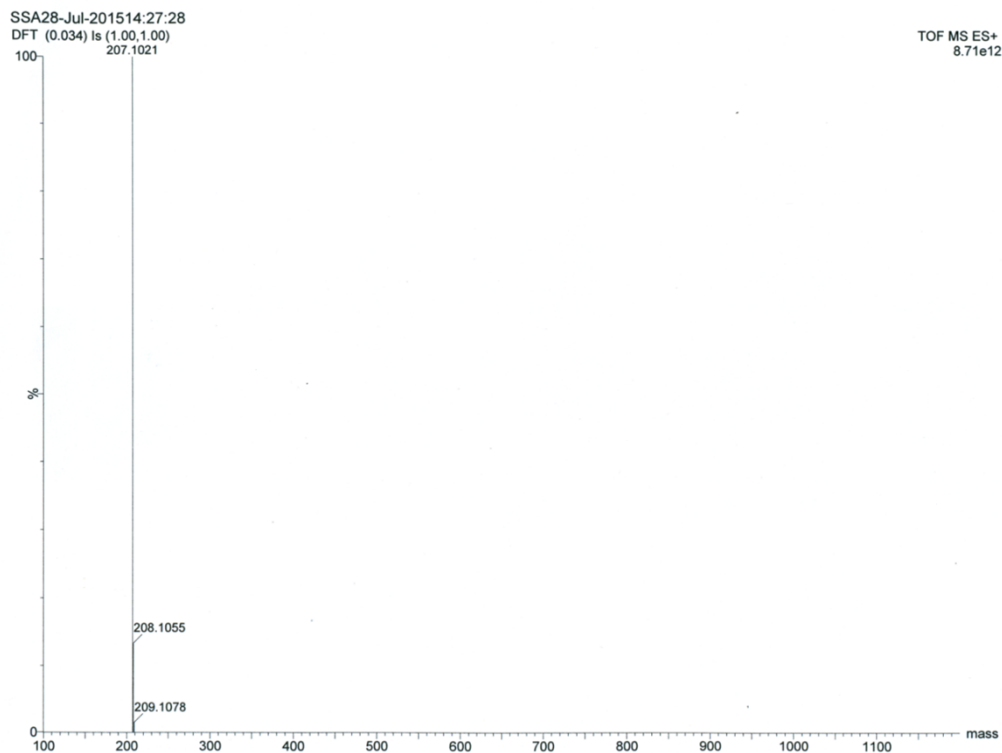

**Figure S-3** HRMS spectrum of **DFTH** in methanol

300 MHz NMR Machine; Department of Chemistry; University of Calcutta; SAP-CAS Program  
Sample:Thy-bpy-1, PMR, CDCL3; Supervisor:Dr.S.S.Adhikari; Dt:12/09/14 Operator S.Chatterjee

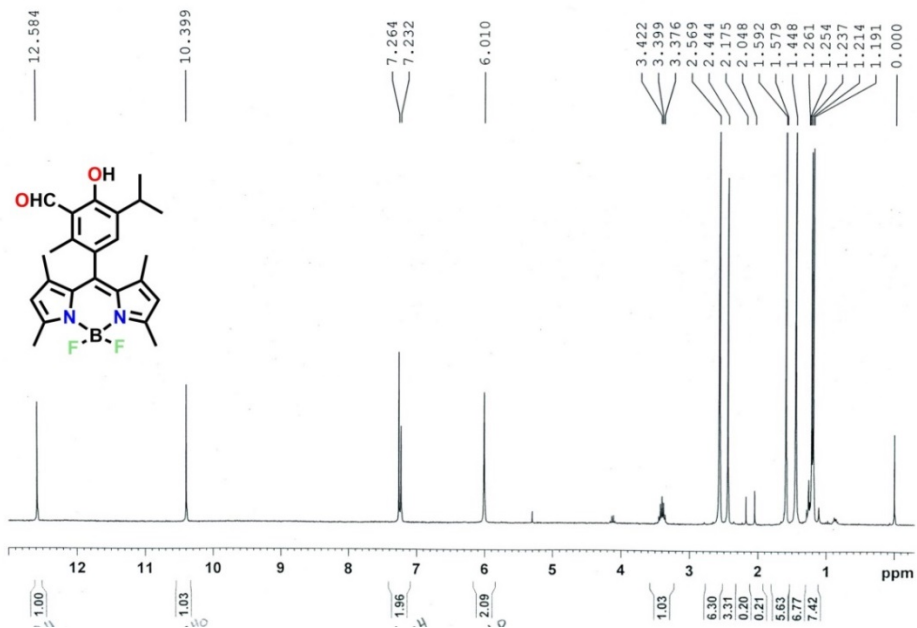

**Figure S-4**  $^1\text{H}$  NMR spectrum of **THBPY** in  $\text{CDCl}_3$

300 MHz NMR Machine; Department of Chemistry; University of Calcutta; SAP-CAS Program  
 Sample: Thy-bpy;  $^{13}\text{C}$ ,  $\text{CDCl}_3$ ; Supervisor: Dr. S. S. Adhikari; Dt: 15/09/14 Operator S. Chatterjee

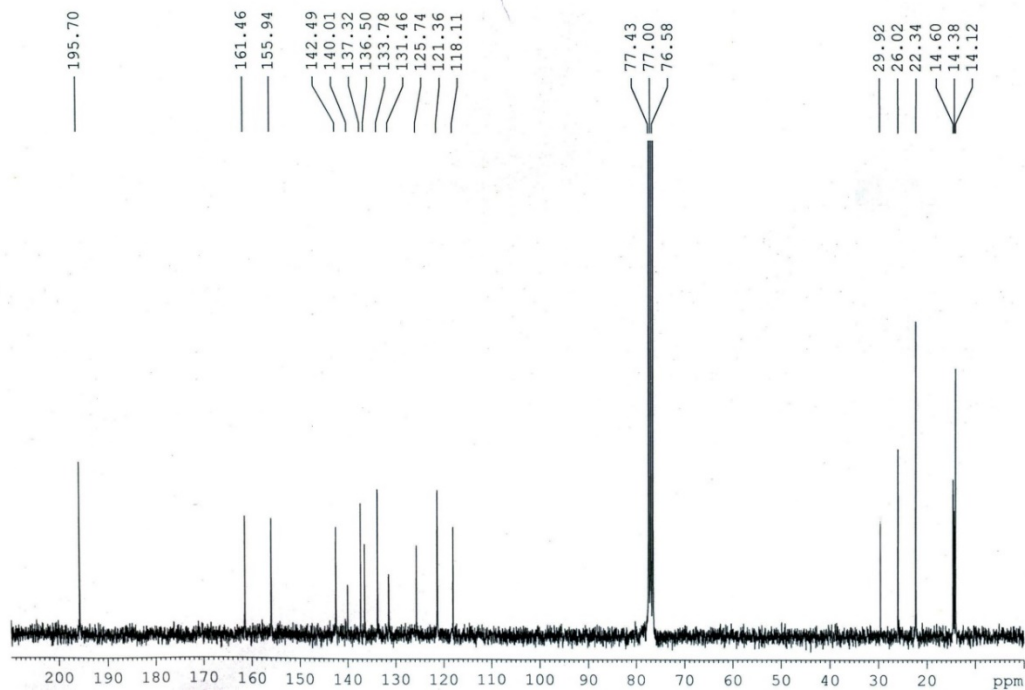

Figure S-5  $^{13}\text{C}$  NMR spectrum of THBPY in  $\text{CDCl}_3$

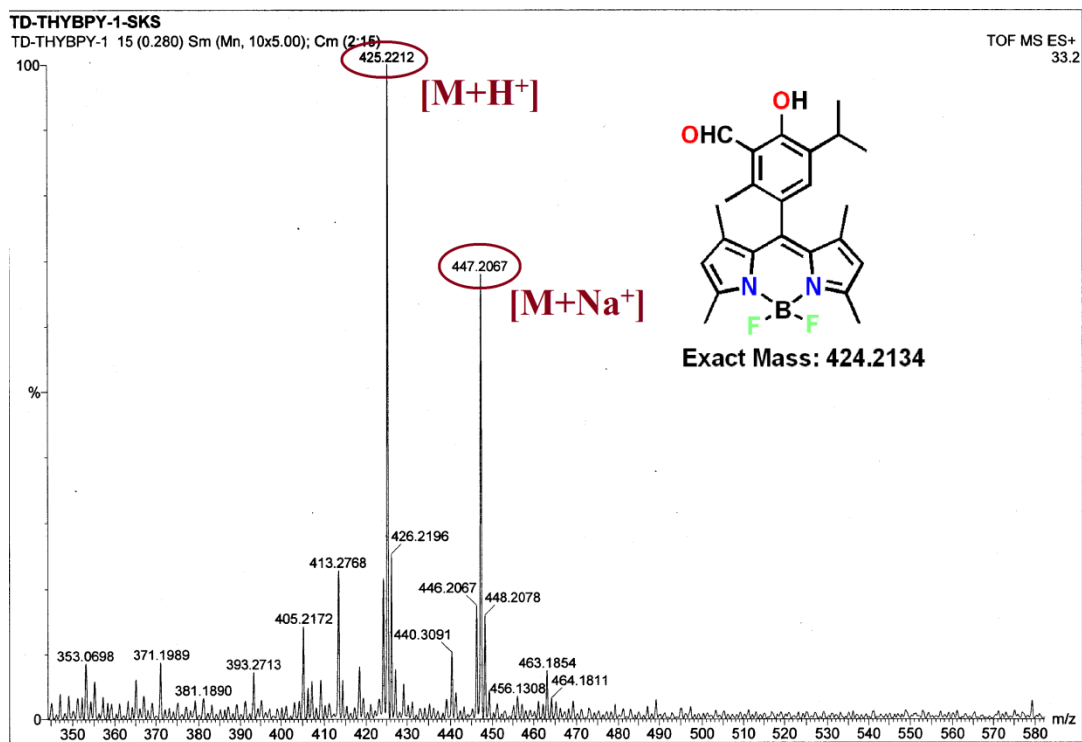

Figure S-6 HRMS spectrum of THBPY in methanol

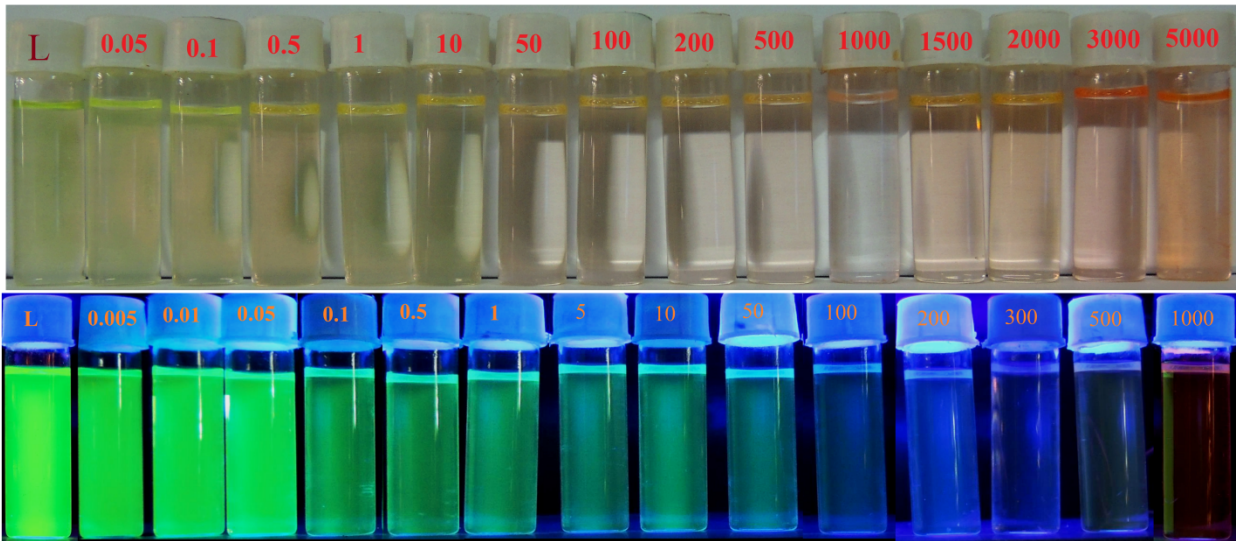

**Figure S-7** Color changes of **THBPY** (10  $\mu\text{M}$ ) in DMSO-HEPES buffer (0.01 M, pH 7.4) (1: 9, v/v) media upon gradual addition of Lys from 0.05 to 5000.0  $\mu\text{M}$  (bare eye, top) and under UV light for Lys 0.005  $\mu\text{M}$  to 1000  $\mu\text{M}$  (bottom).

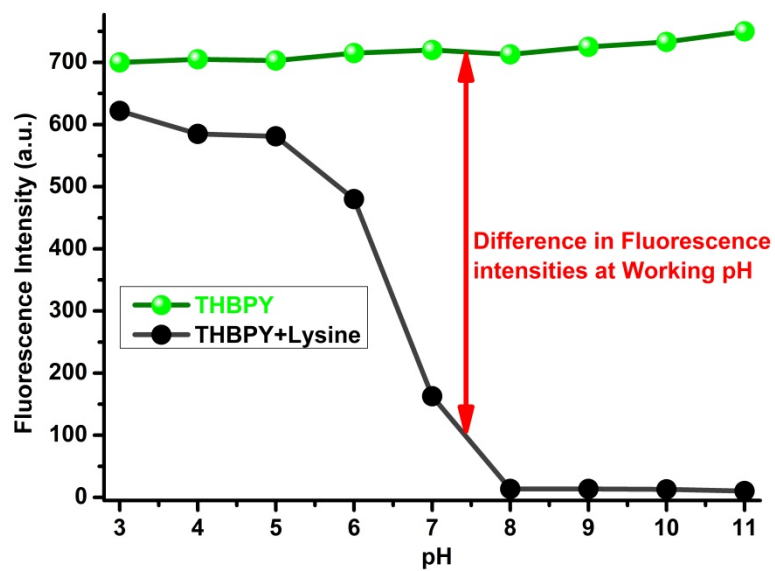

**Figure S-8** Effect of pH on the emission intensity of **THBPY** and [**THBPY-Lys**] adduct

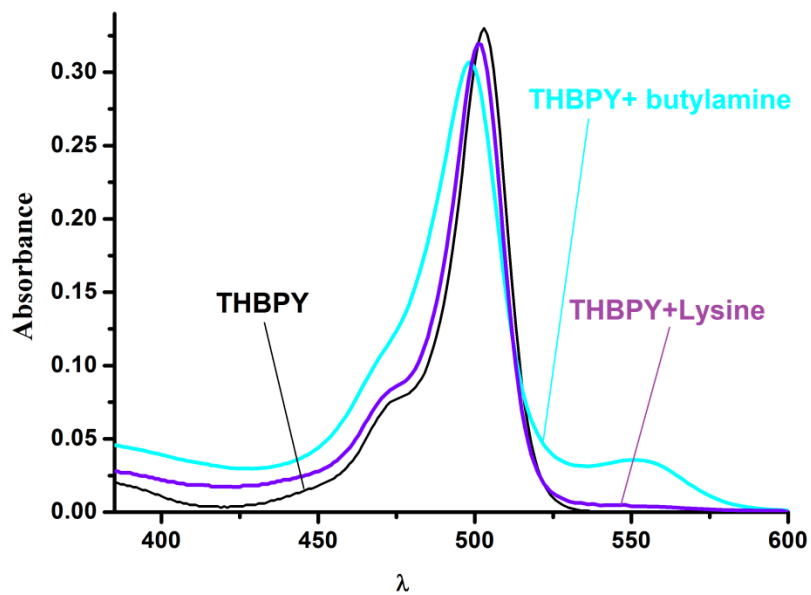

**Figure S-9** Change in absorbance of **THBPY** upon addition of butyl amine in DMSO–HEPES buffer (1: 9, v/v, 0.01 M, pH 7.4)



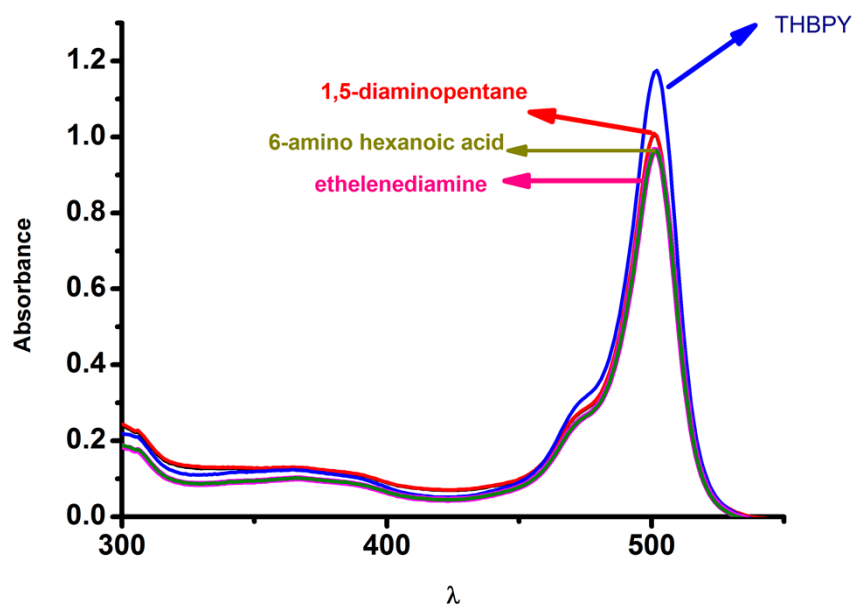

**Figure S-10** Changes in absorbance of **THBPY** (10  $\mu\text{M}$ ) upon addition of 1,5-diaminopentane, 6-amino hexanoic acid and ethylenediamine (50  $\mu\text{M}$ ) in DMSO-HEPES buffer, 1: 9, v/v, 0.01 M, pH 7.4 .

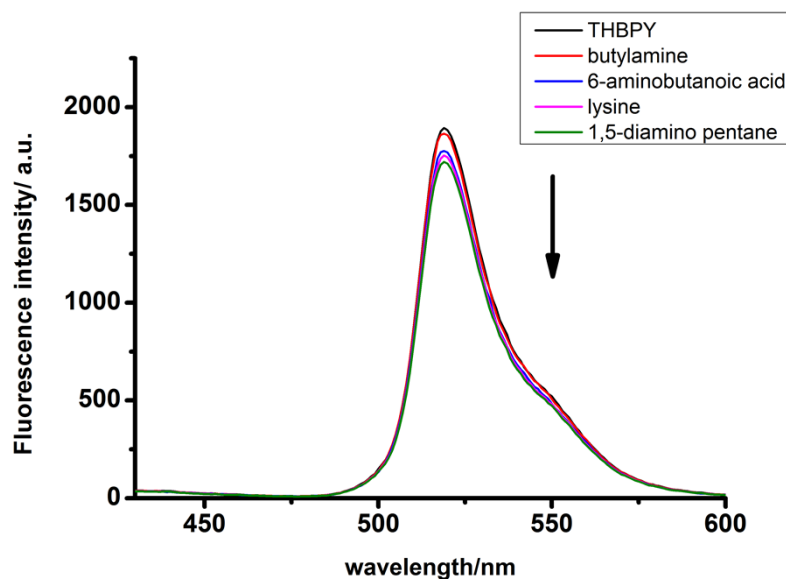

**Figure S-11** Changes in fluorescence of **THBPY** (10  $\mu\text{M}$ ) upon addition of butyl amine, 1,5-diaminopentane, 6-amino hexanoic acid, ethylenediamine (50  $\mu\text{M}$ ) in DMSO-HEPES buffer (1: 9, v/v, 0.01 M, pH 7.4) .

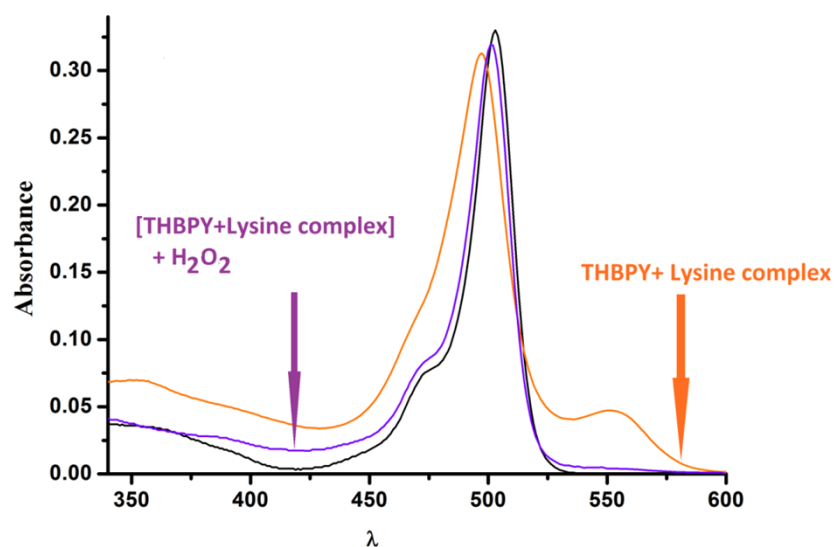

**Figure S-12** Reversibility of absorbance of [THBPY+ Lys] adduct (50 μM) in DMSO–HEPES buffer (1: 9, v/v, 0.01 M, pH 7.4) upon addition of 10,100 μM H<sub>2</sub>O<sub>2</sub> solutions.

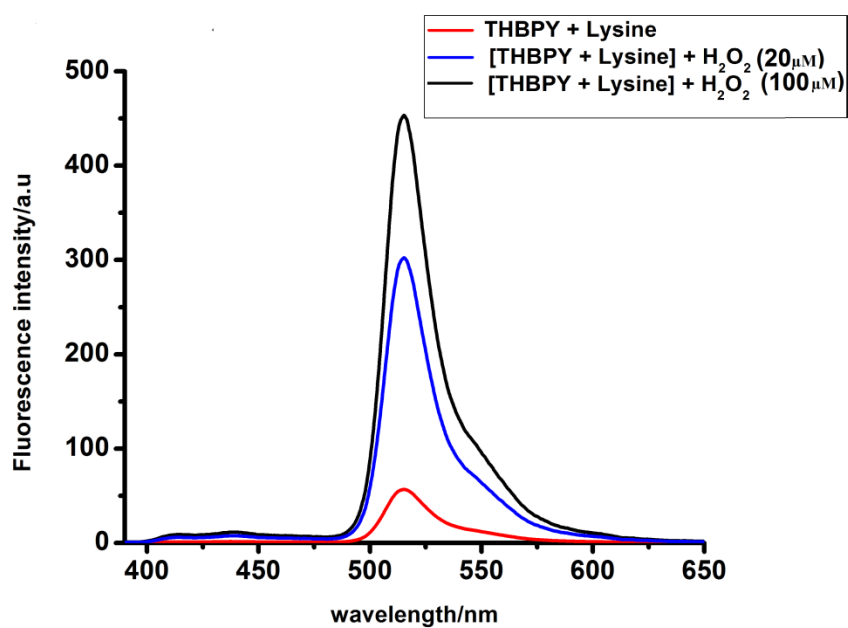

**Figure S-13** Reversibility of fluorescence spectrum of the [THBPY+ Lys] adduct (10 μM) in DMSO–HEPES buffer (1: 9, v/v, 0.01 M, pH 7.4) upon addition of 20,100 μM H<sub>2</sub>O<sub>2</sub> solutions.

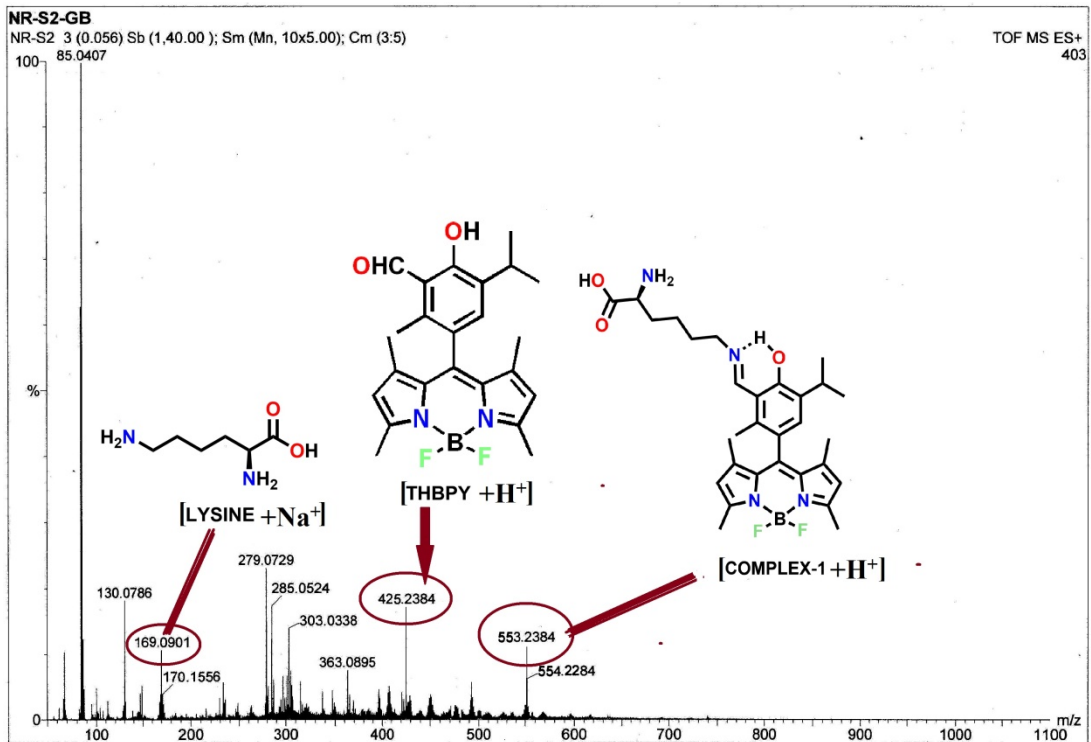

Figure S-14 HRMS spectrum of the solution of [THBPY+ Lys] adduct after treatment of H<sub>2</sub>O<sub>2</sub>.

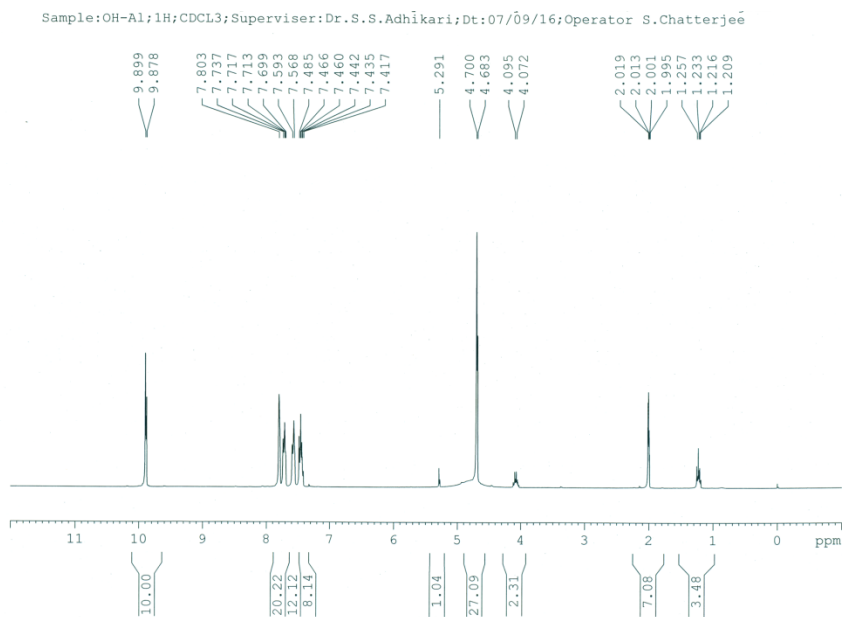

Figure S-15 <sup>1</sup>H NMR spectrum of 1 in CDCl<sub>3</sub>

sample: ON-A17130; CDCl3; supervisor: DR. S. S. Adhikari; Dt: 12/09/16; Operator S. Chatterjee

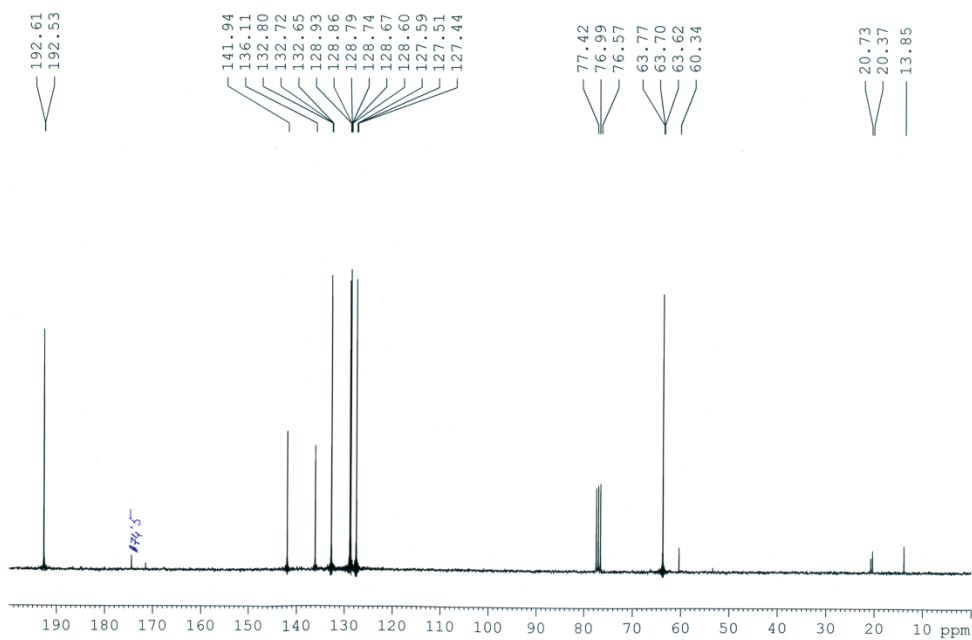

Figure S-16 <sup>13</sup>C NMR spectrum of **1** in CDCl<sub>3</sub>

Sample: DKM-SSA-AG-BPY-AL-2; 1H, CDCl3; Supervisor: Prof. D. K. Maiti; Dt: 09/09/16

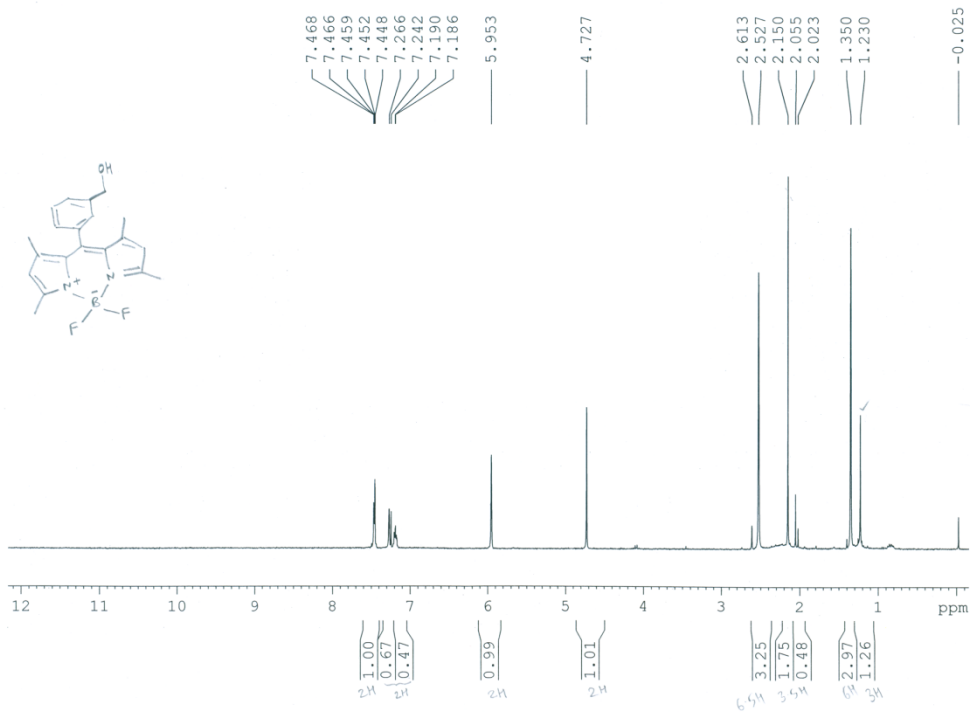

Figure S-17 <sup>1</sup>H NMR spectrum of **2** in CDCl<sub>3</sub>

Sample: Dry-A1-2; 13C; CDCl3; Supervisor: Dr. S. S. Adhikari; Dt: 12/09/16; Operator S. Chatterjee

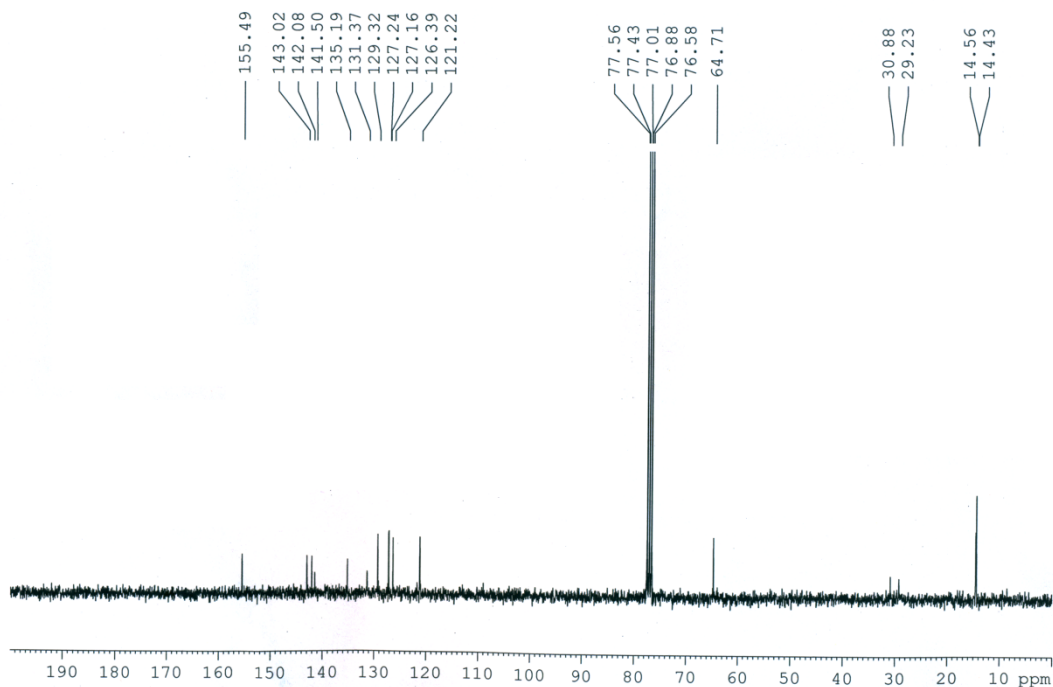

Figure S-18  $^{13}\text{C}$  NMR spectrum of **2** in  $\text{CDCl}_3$

Sample: BPy-3; 1H; CDCl3; Supervisor: Dr. S. S. Adhikari; Dt: 19/09/16; Operator S. Chatterjee

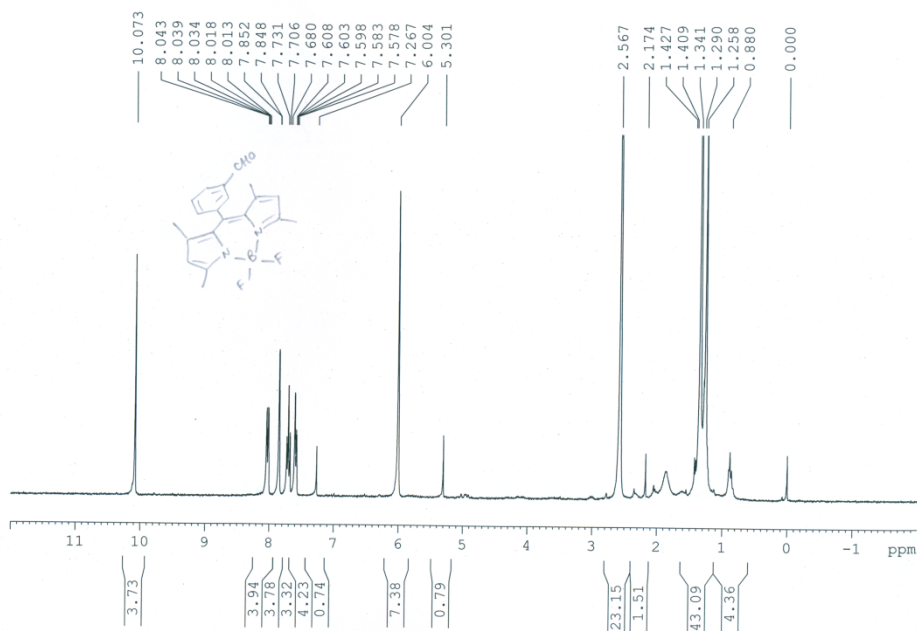

Figure S-19  $^1\text{H}$  NMR spectrum of **3** in  $\text{CDCl}_3$

Sample: BPy-CHO-2;13C;CDCL3;Supervisor:Dr. S.S.Adhikari;Dt:15/09/16;Operator S.Chatterjee

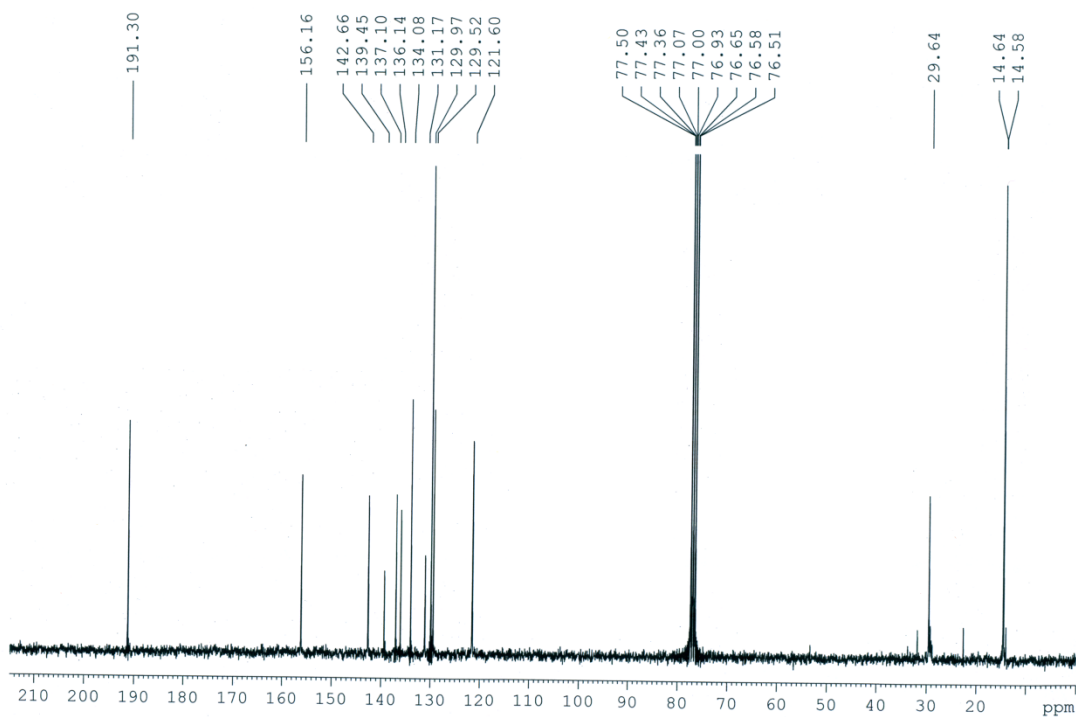

Figure S-20  $^{13}\text{C}$  NMR spectrum of **3** in  $\text{CDCl}_3$

Sample: Fl-al;1H;CDCL3;Supervisor:Dr. S.S.Adhikari;Dt:07/09/16;Operator S.Chatterjee

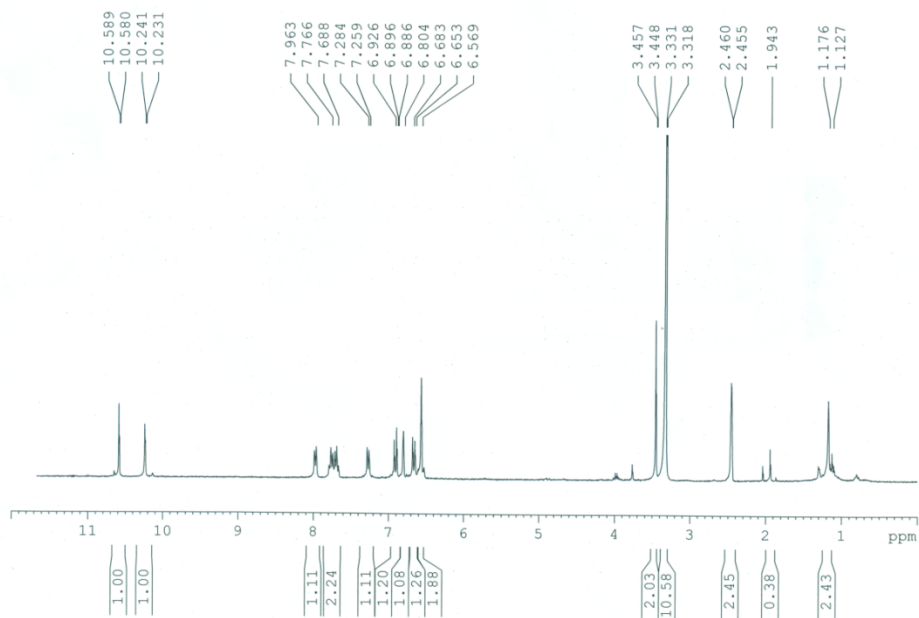

Figure S-21  $^1\text{H}$  NMR spectrum of **4** in  $\text{DMSO-d}_6$

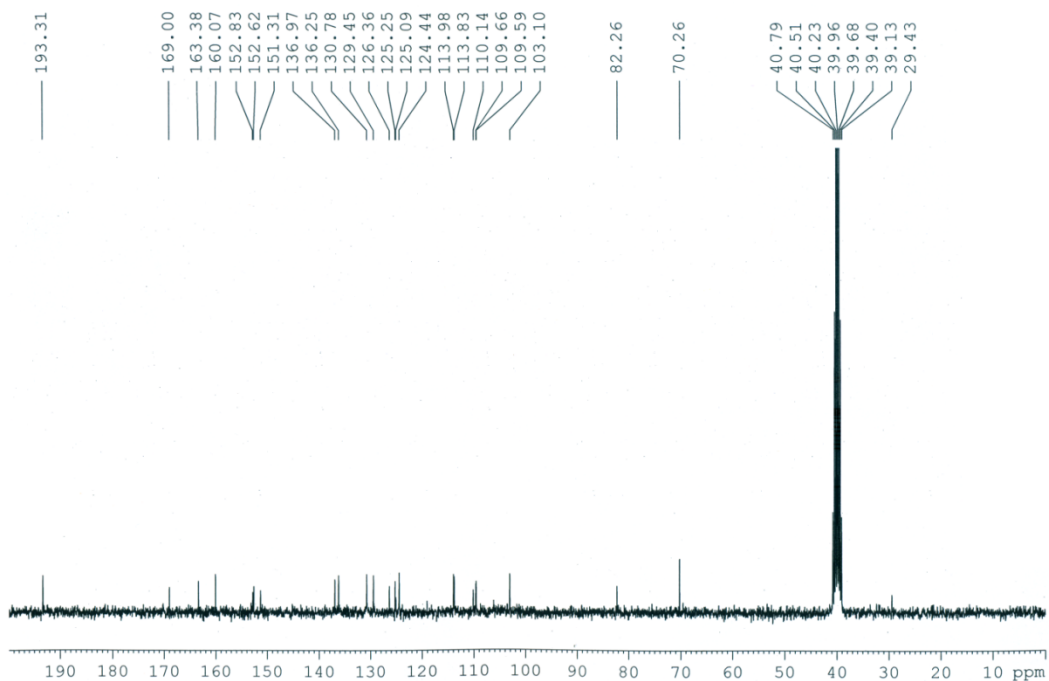

Figure S-22  $^{13}\text{C}$  NMR spectrum of **4** in  $\text{DMSO-d}_6$

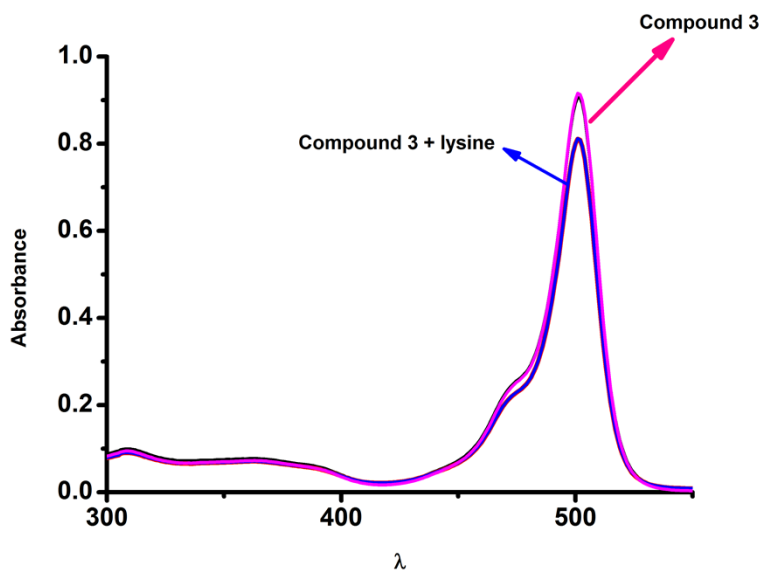

Figure S-23 Changes in the absorbance of **3** ( $10\ \mu\text{M}$ ) upon addition of Lys ( $50\ \mu\text{M}$ ) in  $\text{DMSO-HEPES}$  buffer (1: 9, v/v,  $0.01\ \text{M}$ , pH 7.4).

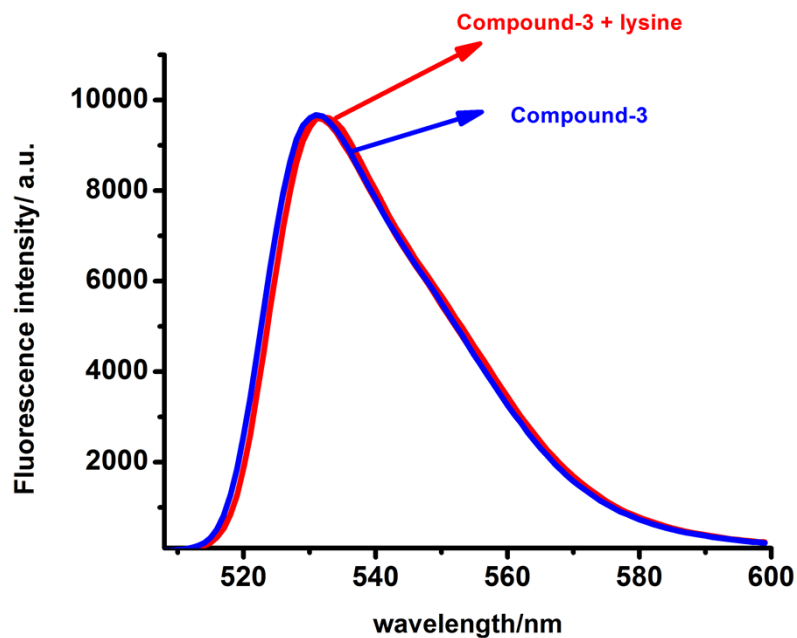

**Figure S-24** Changes in the emission profile of **3** (10  $\mu\text{M}$ ) upon addition of Lys (50  $\mu\text{M}$ ) in DMSO–HEPES buffer (1: 9, v/v, 0.01 M, pH 7.4).

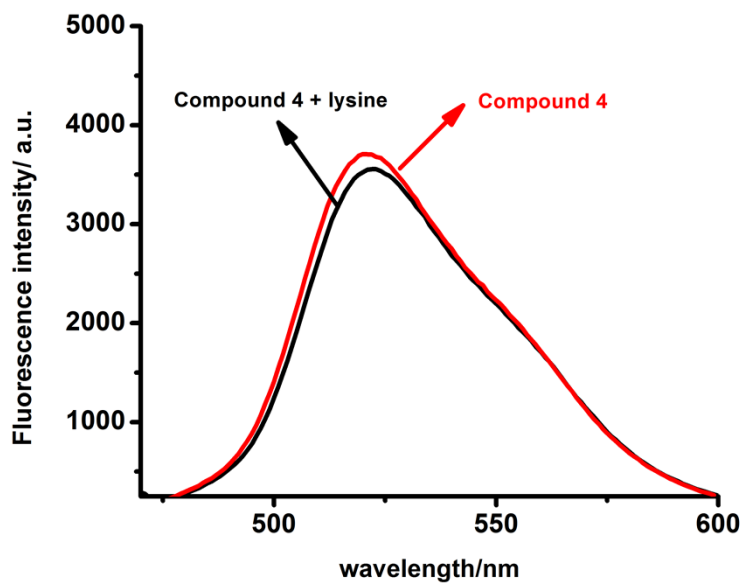

**Figure S-25** Changes in emission profile of **4** (10  $\mu\text{M}$ ) upon addition of Lys (50  $\mu\text{M}$ ) in DMSO–HEPES buffer (1: 9, v/v, 0.01 M, pH 7.4).



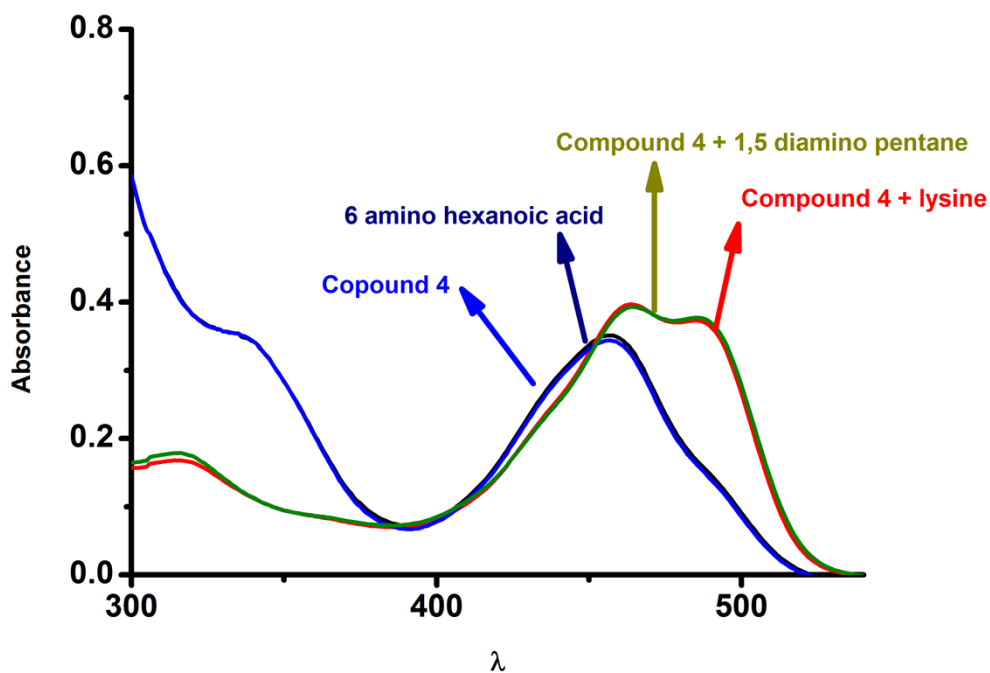

**Figure S-26** Change in absorbance of 4 (10  $\mu\text{M}$ ) upon addition of butyl amine 1,5-diaminopentane, 6-amino hexanoic acid (50  $\mu\text{M}$  in DMSO–HEPES buffer, 1: 9, v/v, 0.01 M, pH 7.4) .

**Table S-1** Crystal data and structure refinement for THBPY (CCDC No. 1409304)

**Bond lengths ( $\text{\AA}$ )**

|           |          |            |          |             |          |
|-----------|----------|------------|----------|-------------|----------|
| (B1)-(F1) | 1.380(3) | (C8)-(N2)  | 1.409(4) | (C7)-(C6)   | 1.406(3) |
| (F1)-(B1) | 1.380(3) | (N2)-(C10) | 1.344(3) | (C6)-(C7)   | 1.406(3) |
| (B1)-(F2) | 1.402(4) | (C10)-(N2) | 1.344(3) | (C7)-(C14)  | 1.494(4) |
| (F2)-(B1) | 1.402(4) | (N1)-(C6)  | 1.409(4) | (C14)-(C7)  | 1.494(4) |
| (B1)-(N2) | 1.545(4) | (C6)-(N1)  | 1.409(4) | (C8)-(C12)  | 1.437(3) |
| (N2)-(B1) | 1.545(4) | (N1)-(C2)  | 1.340(3) | (C12)-(C8)  | 1.437(3) |
| (B1)-(N1) | 1.552(4) | (C2)-(N1)  | 1.340(3) | (C6)-(C4)   | 1.416(3) |
| (N1)-(B1) | 1.552(4) | (C7)-(C8)  | 1.389(3) | (C4)-(C6)   | 1.416(3) |
| (N2)-(C8) | 1.409(4) | (C8)-(C7)  | 1.389(3) | (C12)-(C13) | 1.499(4) |

|              |          |              |          |              |          |
|--------------|----------|--------------|----------|--------------|----------|
| (C13)-(C12)  | 1.499(4) | (C13)-(H13C) | 0.96     | (C18)-(C19)  | 1.415(4) |
| (C12)-(C11)  | 1.373(4) | (H13C)-(C13) | 0.96     | (C19)-(C14)  | 1.390(4) |
| (C11)-(C12)  | 1.373(4) | (C3)-(H3)    | 0.93     | (C14)-(C19)  | 1.390(4) |
| (C10)-(C9)   | 1.493(5) | (H3)-(C3)    | 0.93     | (C19)-(C20)  | 1.507(4) |
| (C9)-(C10)   | 1.493(5) | (C5)-(H5A)   | 0.961    | (C20)-(C19)  | 1.507(4) |
| (C10)-(C11)  | 1.396(4) | (H5A)-(C5)   | 0.961    | (C18)-(C17)  | 1.413(4) |
| (C11)-(C10)  | 1.396(4) | (C5)-(H5B)   | 0.959    | (C17)-(C18)  | 1.413(4) |
| (C4)-(C3)    | 1.381(4) | (H5B)-(C5)   | 0.959    | (C18)-(C24)  | 1.454(5) |
| (C3)-(C4)    | 1.381(4) | (C5)-(H5C)   | 0.96     | (C24)-(C18)  | 1.454(5) |
| (C4)-(C5)    | 1.505(4) | (H5C)-(C5)   | 0.96     | (C15)-(H15)  | 0.929    |
| (C5)-(C4)    | 1.505(4) | (C11)-(H11)  | 0.93     | (H15)-(C15)  | 0.929    |
| (C2)-(C3)    | 1.402(5) | (H11)-(C11)  | 0.93     | (C15)-(C14)  | 1.409(4) |
| (C3)-(C2)    | 1.402(5) | (C1)-(H1A)   | 0.96     | (C14)-(C15)  | 1.409(4) |
| (C2)-(C1)    | 1.500(5) | (H1A)-(C1)   | 0.96     | (C17)-(O2)   | 1.353(4) |
| (C1)-(C2)    | 1.500(5) | (C1)-(H1B)   | 0.96     | (O2)-(C17)   | 1.353(4) |
| (C9)-(H9A)   | 0.961    | (H1B)-(C1)   | 0.96     | (C24)-(H24)  | 0.93     |
| (H9A)-(C9)   | 0.961    | (C1)-(H1C)   | 0.961    | (H24)-(C24)  | 0.93     |
| (C9)-(H9B)   | 0.96     | (H1C)-(C1)   | 0.961    | (C24)-(O1)   | 1.233(4) |
| (H9B)-(C9)   | 0.96     | (C16)-(C15)  | 1.375(4) | (O1)-(C24)   | 1.233(4) |
| (C9)-(H9C)   | 0.96     | (C15)-(C16)  | 1.375(4) | (C20)-(H20A) | 0.96     |
| (H9C)-(C9)   | 0.96     | (C16)-(C17)  | 1.404(5) | (H20A)-(C20) | 0.96     |
| (C13)-(H13A) | 0.96     | (C17)-(C16)  | 1.404(5) | (C20)-(H20B) | 0.96     |
| (H13A)-(C13) | 0.96     | (C16)-(C21)  | 1.518(4) | (H20B)-(C20) | 0.96     |
| (C13)-(H13B) | 0.959    | (C21)-(C16)  | 1.518(4) | (C20)-(H20C) | 0.96     |
| (H13B)-(C13) | 0.959    | (C19)-(C18)  | 1.415(4) | (H20C)-(C20) | 0.96     |

|             |          |              |      |              |       |
|-------------|----------|--------------|------|--------------|-------|
| (C21)-(H21) | 0.981    | (H2)-(O2)    | 0.82 | (C22)-(H22A) | 0.96  |
| (H21)-(C21) | 0.981    | (C23)-(H23A) | 0.96 | (H22A)-(C22) | 0.96  |
| (C21)-(C23) | 1.520(5) | (H23A)-(C23) | 0.96 | (C22)-(H22B) | 0.959 |
| (C23)-(C21) | 1.520(5) | (C23)-(H23B) | 0.96 | (H22B)-(C22) | 0.959 |
| (C21)-(C22) | 1.528(4) | (H23B)-(C23) | 0.96 | (C22)-(H22C) | 0.96  |
| (C22)-(C21) | 1.528(4) | (C23)-(H23C) | 0.96 | (H22C)-(C22) | 0.96  |
| (O2)-(H2)   | 0.82     | (H23C)-(C23) | 0.96 |              |       |

***Bond angles (°)***

|                 |          |                   |          |                     |          |
|-----------------|----------|-------------------|----------|---------------------|----------|
| (F1)-(B1)-(F2)  | 108.9(2) | (C7)-(C8)-(C12)   | 132.1(2) | (C10)-(C9)-(H9B)    | 109.5    |
| (F1)-(B1)-(N2)  | 111.3(2) | (N1)-(C6)-(C7)    | 119.8(2) | (C10)-(C9)-(H9C)    | 109.5    |
| (F1)-(B1)-(N1)  | 111.3(2) | (N1)-(C6)-(C4)    | 108.0(2) | (H9A)-(C9)-(H9B)    | 109.5    |
| (F2)-(B1)-(N2)  | 109.2(2) | (C7)-(C6)-(C4)    | 132.1(3) | (H9A)-(C9)-(H9C)    | 109.5    |
| (F2)-(B1)-(N1)  | 109.4(2) | (C8)-(C12)-(C13)  | 129.7(2) | (H9B)-(C9)-(H9C)    | 109.5    |
| (N2)-(B1)-(N1)  | 106.6(2) | (C8)-(C12)-(C11)  | 105.8(2) | (C12)-(C13)-(H13A)  | 109.4    |
| (B1)-(N2)-(C8)  | 125.4(2) | (C13)-(C12)-(C11) | 124.5(3) | (C12)-(C13)-(H13B)  | 109.5    |
| (B1)-(N2)-(C10) | 126.2(2) | (N2)-(C10)-(C9)   | 121.8(3) | (C12)-(C13)-(H13C)  | 109.4    |
| (C8)-(N2)-(C10) | 108.3(2) | (N2)-(C10)-(C11)  | 109.0(3) | (H13A)-(C13)-(H13B) | 109.5    |
| (B1)-(N1)-(C6)  | 125.5(2) | (C9)-(C10)-(C11)  | 129.2(3) | (H13A)-(C13)-(H13C) | 109.5    |
| (B1)-(N1)-(C2)  | 126.5(3) | (C6)-(C4)-(C3)    | 106.1(3) | (H13B)-(C13)-(H13C) | 109.6    |
| (C6)-(N1)-(C2)  | 108.0(2) | (C6)-(C4)-(C5)    | 128.7(3) | (C4)-(C3)-(C2)      | 108.8(3) |
| (C8)-(C7)-(C6)  | 121.5(2) | (C3)-(C4)-(C5)    | 125.3(3) | (C4)-(C3)-(H3)      | 125.6    |
| (C8)-(C7)-(C14) | 118.6(2) | (N1)-(C2)-(C3)    | 109.1(3) | (C2)-(C3)-(H3)      | 125.6    |
| (C6)-(C7)-(C14) | 119.9(2) | (N1)-(C2)-(C1)    | 122.7(3) | (C4)-(C5)-(H5A)     | 109.5    |
| (N2)-(C8)-(C7)  | 120.6(2) | (C3)-(C2)-(C1)    | 128.2(3) | (C4)-(C5)-(H5B)     | 109.5    |
| (N2)-(C8)-(C12) | 107.4(2) | (C10)-(C9)-(H9A)  | 109.4    | (C4)-(C5)-(H5C)     | 109.5    |

|                   |          |                     |          |                          |
|-------------------|----------|---------------------|----------|--------------------------|
| (H5A)-(C5)-(H5B)  | 109.4    | (C16)-(C17)-(18)    | 121.3(3) | (H23A)-(C23)-(H23B)109.4 |
| (H5A)-(C5)-(H5C)  | 109.4    | (C16)-(C17)-(O2)    | 117.5(3) | (H23A)-(C23)-(H23C)109.5 |
| (H5B)-(C5)-(H5C)  | 109.5    | (C18)-(C17)-(O2)    | 121.1(3) | (H23B)-(C23)-(H23C)109.5 |
| (C12)-(C11)-(C10) | 109.5(3) | (C7)-(C14)-(C19)    | 121.0(2) | (C21)-(C22)-(H22A) 109.4 |
| (C12)-(C11)-(H11) | 125.2    | (C7)-(C14)-(C15)    | 119.0(2) | (C21)-(C22)-(H22B) 109.5 |
| (C10)-(C11)-(H11) | 125.2    | (C19)-(C14)-(C15)   | 119.9(2) | (C21)-(C22)-(H22C) 109.5 |
| (C2)-(C1)-(H1A)   | 109.5    | (C18)-(C24)-(H24)   | 117.7    | (H22A)-(C22)-(H22B)109.5 |
| (C2)-(C1)-(H1B)   | 109.5    | (C18)-(C24)-(O1)    | 124.6(3) | (H22A)-(C22)-(H22C)109.4 |
| (C2)-(C1)-(H1C)   | 109.5    | (H24)-(C24)-(O1)    | 117.7    | (H22B)-(C22)-(H22C)109.5 |
| (H1A)-(C1)-(H1B)  | 109.5    | (C19)-(C20)-(H20A)  | 109.5    |                          |
| (H1A)-(C1)-(H1C)  | 109.4    | (C19)-(C20)-(H20B)  | 109.4    |                          |
| (H1B)-(C1)-(H1C)  | 109.4    | (C19)-(C20)-(H20C)  | 109.5    |                          |
| (C15)-(C16)-(C17) | 116.7(2) | (H20A)-(C20)-(H20B) | 109.5    |                          |
| (C15)-(C16)-(C21) | 123.6(2) | (H20A)-(C20)-(H20C) | 109.5    |                          |
| (C17)-(C16)-(C21) | 119.7(2) | (H20B)-(C20)-(H20C) | 109.5    |                          |
| (C18)-(C19)-(C14) | 118.0(2) | (C16)-(C21)-(H21)   | 107.6    |                          |
| (C18)-(C19)-(C20) | 121.6(2) | (C16)-(C21)-(C23)   | 113.4(3) |                          |
| (C14)-(C19)-(C20) | 120.4(2) | (C16)-(C21)-(C22)   | 110.0(3) |                          |
| (C19)-(C18)-(C17) | 120.5(2) | (H21)-(C21)-(C23)   | 107.6    |                          |
| (C19)-(C18)-(C24) | 120.6(3) | (H21)-(C21)-(C22)   | 107.6    |                          |
| (C17)-(C18)-(C24) | 118.8(3) | (C23)-(C21)-(C22)   | 110.4(3) |                          |
| (C16)-(C15)-(H15) | 118.3    | (C17)-(O2)-(H2)     | 109.4    |                          |
|                   |          | (C21)-(C23)-(H23A)  | 109.5    |                          |
| (C16)-(C15)-(C14) | 123.5(2) | (C21)-(C23)-(H23B)  | 109.5    |                          |
| (H15)-(C15)-(C14) | 118.2    | (C21)-(C23)-(H23C)  | 109.5    |                          |

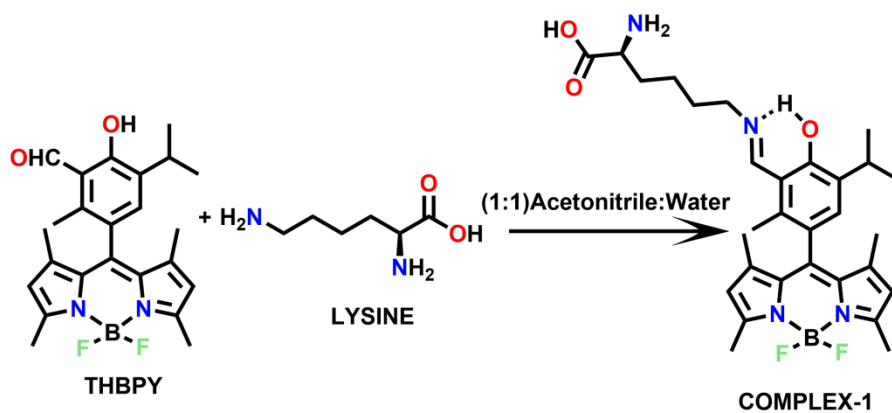

Scheme S-1 Synthesis of [THBPY- Lys] adduct (complex-1)

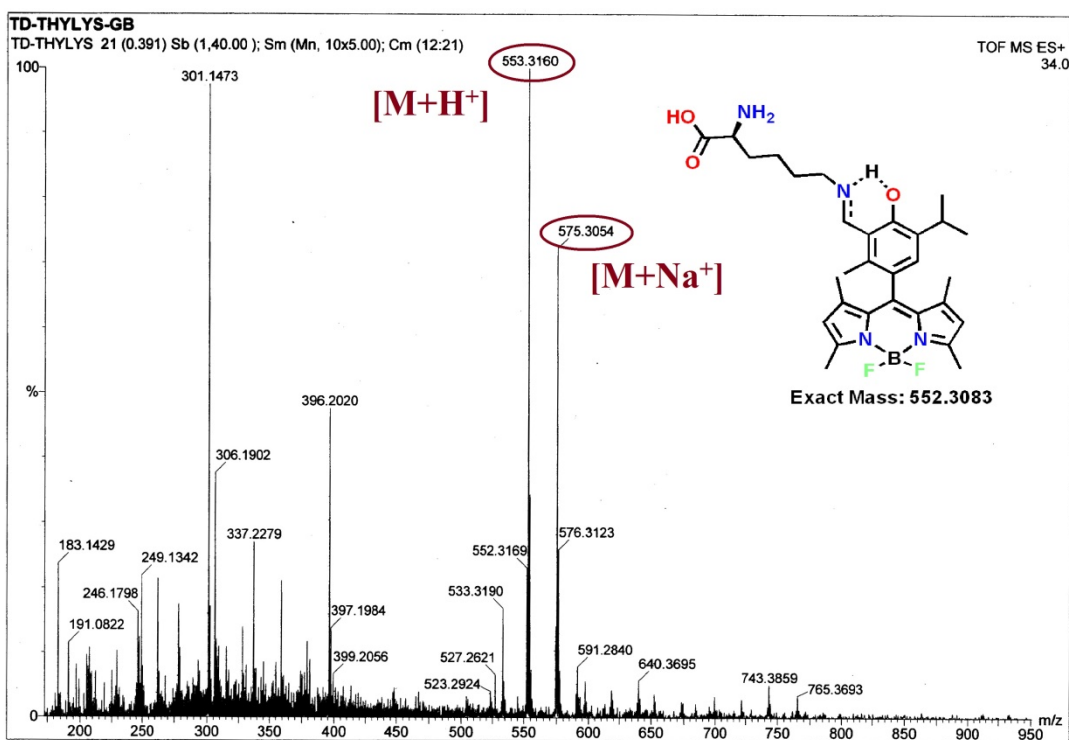

Figure S-27 HRMS spectrum of [THBPY- Lys] adduct in methanol.

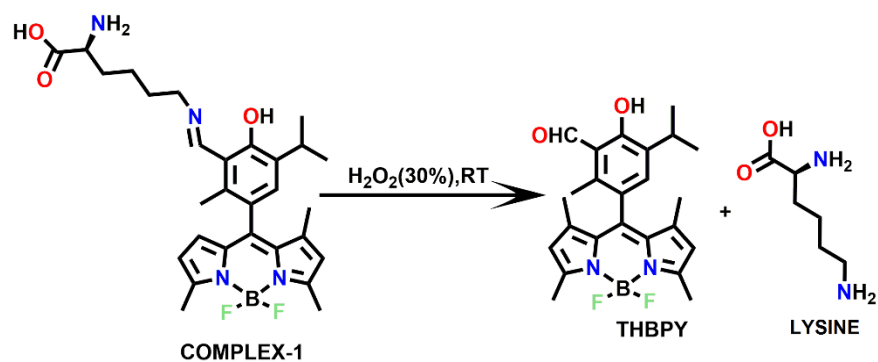

**Scheme S-2** Reversibility of [THBPY- Lys] adduct in presence of hydrogen peroxide

**Table S-2** Frontier molecular orbitals (MOs) of THBPY and the energy levels of the MOs are shown (in a.u). Calculations are based on ground state geometry by DFT at the B3LYP/6-31G/level using Gaussian 09

| Frontier orbital | Energy (a.u.) | Energy optimised geometry                                                            |
|------------------|---------------|--------------------------------------------------------------------------------------|
| LUMO+1           | -0.0498       | 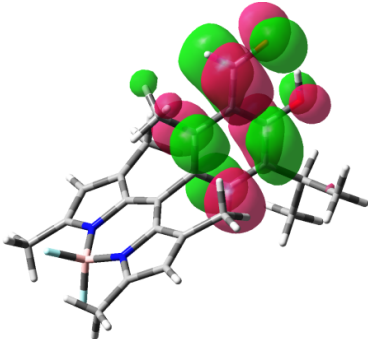 |

|        |         |                                                                                      |
|--------|---------|--------------------------------------------------------------------------------------|
| LUMO   | -0.0985 | 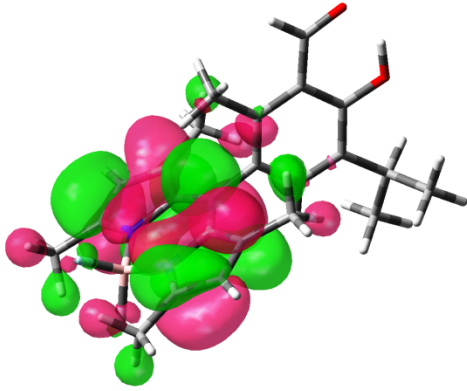   |
| HOMO   | -0.2084 |   |
| HOMO-1 | -0.2410 |  |

**Table S-3** Frontier molecular orbitals (MOs) of **THBPY-lysine (neutral)** and the energy levels of the MOs are shown (in a.u). Calculations are based on ground state geometry by DFT at the B3LYP/6-31G/level using Gaussian 09.

| Frontier orbital | Energy (a.u.) | Energy optimised geometry                                                            |
|------------------|---------------|--------------------------------------------------------------------------------------|
| LUMO+1           | 0.0565        | 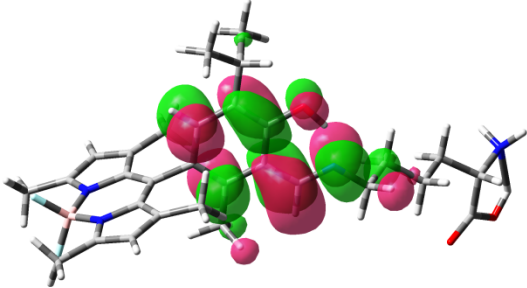   |
| LUMO             | -0.0738       |   |
| HOMO             | -0.1253       |  |



|               |         |                                                                                    |
|---------------|---------|------------------------------------------------------------------------------------|
| <b>HOMO-1</b> | -0.1433 | 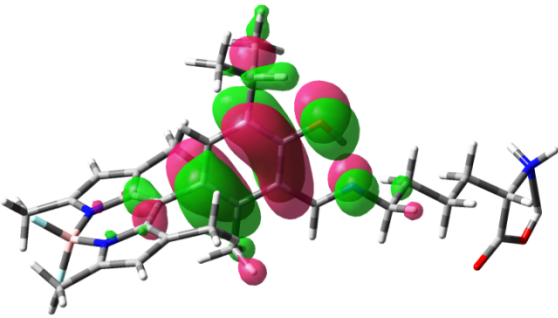 |
|---------------|---------|------------------------------------------------------------------------------------|

**Table S-4** Frontier molecular orbitals (MOs) of **THBPY-lysine (cationic)** and the energy levels of the MOs are shown (in a.u). Calculations are based on ground state geometry by DFT at the B3LYP/6-31G/level using Gaussian 09.

| <b>Frontier orbital</b> | <b>Energy (a.u.)</b> | <b>Energy optimized geometry</b>                                                     |
|-------------------------|----------------------|--------------------------------------------------------------------------------------|
| <b>LUMO+1</b>           | 0.0613               | 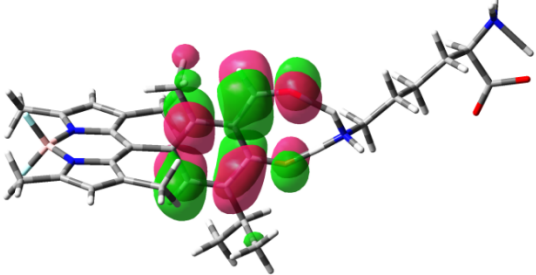 |
| <b>LUMO</b>             | -0.08011             |  |

|                      |                |                                                                                    |
|----------------------|----------------|------------------------------------------------------------------------------------|
| <p><b>HOMO</b></p>   | <p>-0.1415</p> | 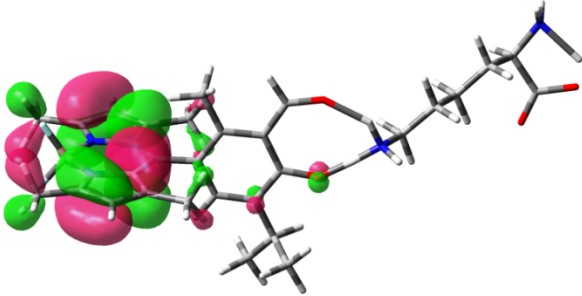 |
| <p><b>HOMO-1</b></p> | <p>-0.1612</p> |  |

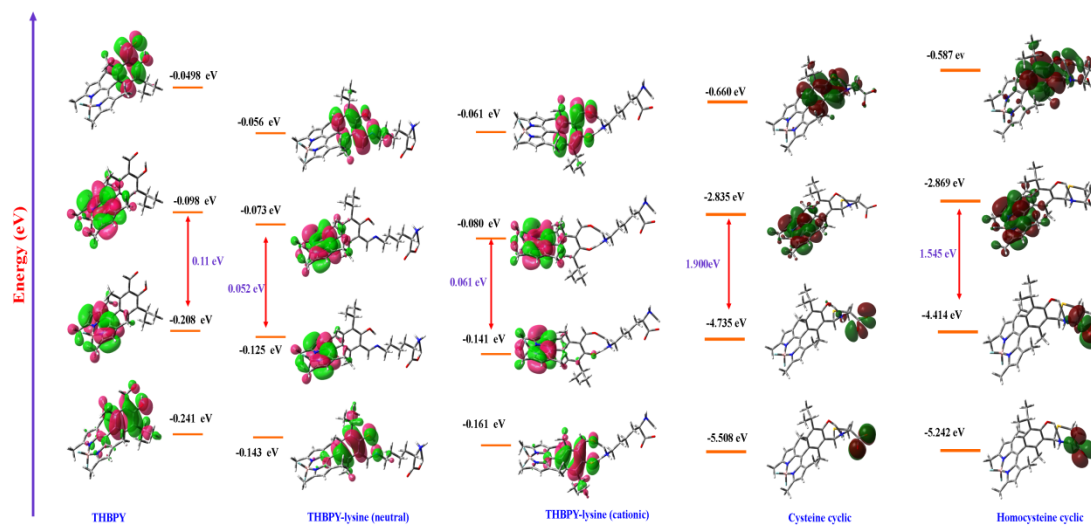

**Figure S-28** Selected MOs of THBPY, [THBPY + cysteine], [THBPY + homo cysteine], (not to scale; isovalue = 0.02).

## Cytotoxicity assay

*In vitro* cytotoxicity was measured by using the colorimetric methyl thiazolyltetrazolium (MTT) assay against MDA-MB 231 cells. Cells were seeded into 24-well tissue culture plate in presence of 500  $\mu$ L Dulbecco's modified eagle medium (DMEM) supplemented with 10% fetal bovine serum (FBS) and 1% penicillin/streptomycin at 37 °C temperature and 5 % CO<sub>2</sub> atmosphere for overnight and then incubated for 12h in presence of **THBPY** at different concentrations (10-100  $\mu$ M). Then cells were washed with PBS buffer and 500  $\mu$ L supplemented DMEM medium was added. Subsequently, 50  $\mu$ L 3-(4,5-dimethylthiazol-2-yl)-2,5-diphenyltetrazolium bromide MTT (5 mg/mL) was added to each well and incubated for 4h. Next, violet formazan was dissolved in 500  $\mu$ L of sodium dodecyl sulfate solution in water/DMF mixture. The absorbance of solution was measured at 570 nm using microplate reader. The cell viability was determined by assuming 100 % cell viability for cells without MDA-MB 231 cells.

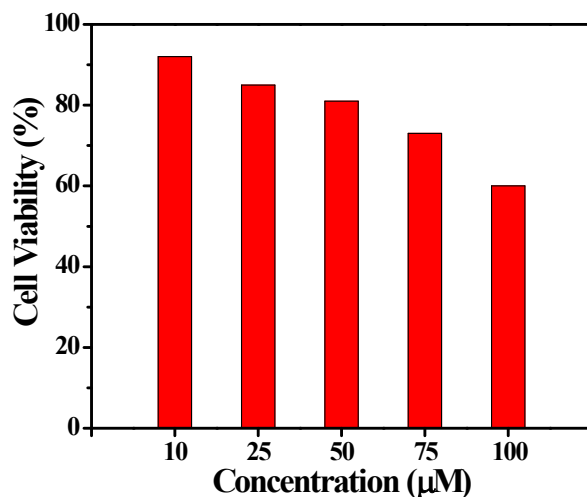

**Figure S-29** Cell viability of **THBPY** at different concentration against MDA-MB 231 cells after 12h incubation.

Ref:

(1) Xu, J.; Li, Q.; Yue, Y.; Guo, Y.; Shao, S. *Biosens. Bioelectron.* **2014**, *56*, 58–63.
